# Supplementary material for: Nickel stabilized by triazole-functionalized carbon nanotubes as a novel reusable and efficient heterogeneous nanocatalyst for the Suzuki–Miyaura coupling reaction
Source: Royal Society of Chemistry journal article supplement (doi:10.1039/c6ra23004k), 2016-01-01
Supplement: c6ra23004k1.pdf [file c6ra23004k1.pdf]

# Supporting Information

**Nickel stabilized by triazole-functionalized carbon nanotubes as a novel  
reusable and efficient heterogeneous nanocatalyst for the Suzuki–Miyaura  
coupling reaction**

Abdol R. Hajipour<sup>1, 2\*</sup>, Parisa Abolfathi<sup>1</sup>

*<sup>1</sup>Pharmaceutical Research Laboratory, Department of Chemistry, Isfahan*

*University of Technology, Isfahan 84156, IR Iran, E-mail*

*<sup>2</sup>Department of Neuroscience, University of Wisconsin, Medical School, 1300 University  
Avenue, Madison, 53706-1532, WI, USA*

---

\*Corresponding author: Tel.: + 98 313 391 3262; fax: + 98 313 391 2350; e-mail:

haji@cc.iut.ac.ir.

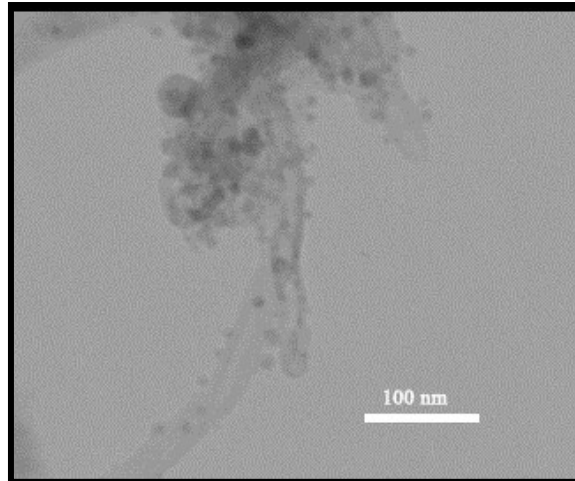

Fig S1 TEM micrograph of the recovered catalyst

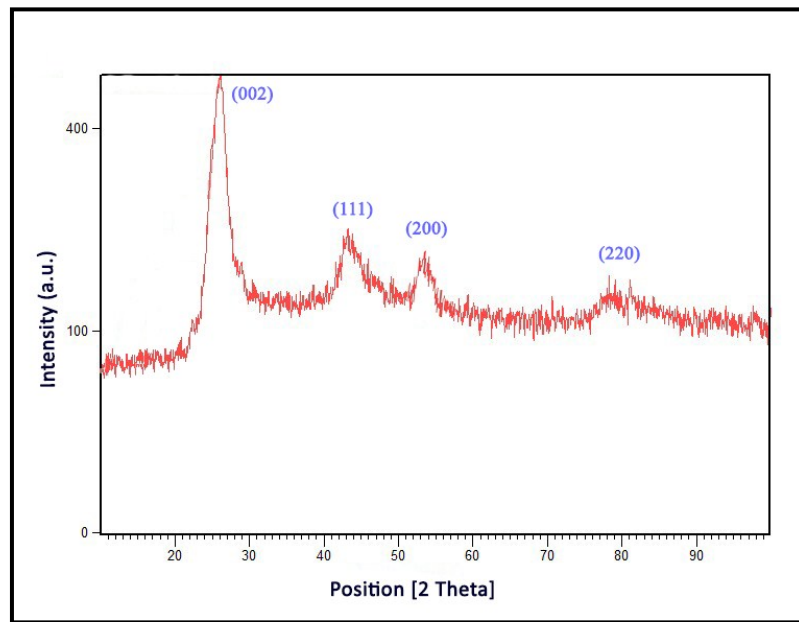

Fig S2 XRD pattern of the recovered catalyst

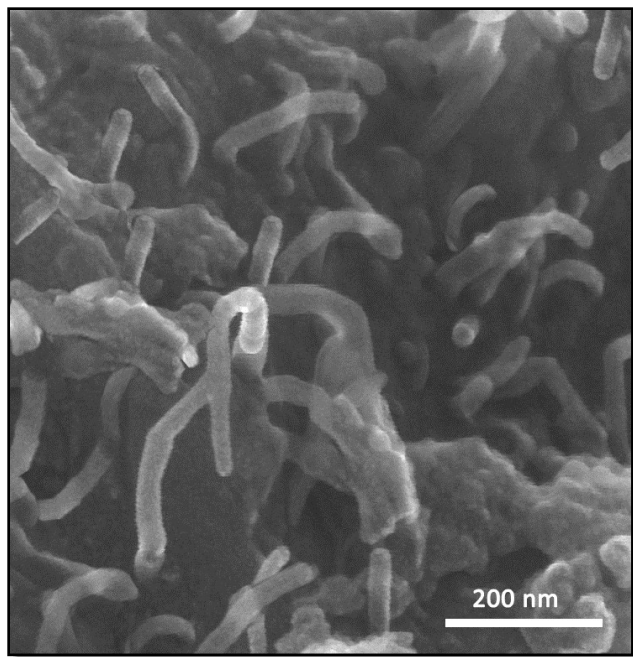

Fig S3 SEM photograph of the recovered catalyst

## **<sup>1</sup>H-NMR, FT-IR and boiling points of some biaryl derivatives**

### ***Data section***

#### **4-nitrobiphenyl**

White solid, melting point: 88°C

<sup>1</sup>H-NMR (400 MHz, CDCl<sub>3</sub>, ppm, TMS): δ = 8.3 (d, *J* = 8.7 Hz, 2H), 7.7 (d, *J* = 8.7 Hz, 2H), 7.65 (dd, *J* = 1.8, 5.4 Hz, 2H), 7.55-7.40 (m, 3H).

FT-IR (KBr, cm<sup>-1</sup>): ν = 3363, 3242, 1596, 1513, 1351, 853, 739, 711.

---

#### **4-Acetylbiphenyl**

White solid, melting point: 121°C

<sup>1</sup>H NMR (400 MHz, CDCl<sub>3</sub>, ppm, TMS): δ = 8 (d, *J* = 8.4 Hz, 2H), 7.66 (d, *J* = 8.4 Hz, 2H), 7.59-7.61 (m, 2H), 7.37-7.46 (m, 3H), 2.61 (s, 3H)

FT-IR (KBr, cm<sup>-1</sup>): ν = 2918, 1726, 1669, 1410, 1268, 1120, 768, 690, 591

---

#### **4-Methoxybiphenyl**

White solid, melting point 87 °C:

<sup>1</sup>H NMR (400 MHz, CDCl<sub>3</sub>, ppm, TMS): δ = 7.50-7.54 (m, 4H), 7.39 (t, *J* = 12 Hz, 2H), 7.28 (t, 16, 1H), 6.96 (d, *J* = 8.8, 2H), 3.83 (s, 3H)

IR (KBr, cm<sup>-1</sup>): ν = 3073, 2963, 2836, 1722, 1578, 1486, 1287, 1247, 1032, 819, 612, 507

---

## 2-Acetylbiphenyl

$^1\text{H}$  NMR (400 MHz,  $\text{CDCl}_3$ , ppm, TMS):  $\delta$  = 8.11(t,  $J=1.6$  Hz,  $J=2$  Hz, 1H), 7.87(d,  $J=7.6$  Hz, 1H), 7.73(d,  $J=8.4$  Hz, 1H), 7.55(d,  $J=6.8$  Hz, 2H), 7.48(t,  $J=8$  Hz,  $J=7.6$  Hz, 1H), 7.40(t,  $J=7.2$  Hz,  $J=7.6$  Hz, 2H), 7.33(d,  $J=7.2$ , 1H)
